# Supplementary material for: Integrative transcriptomic profiling of mRNA, miRNA, circRNA, and lncRNA in alveolar macrophages isolated from PRRSV-infected porcine
Source: Front Immunol. 2023 Aug 24;14:1258778. doi: 10.3389/fimmu.2023.1258778 (PMC10491896; doi:10.3389/fimmu.2023.1258778)
Supplement: Supplementary Table 4 — Table of differentially expressed circRNA. [file Table_4.xlsx]

## Sheet: 3dpi
circRNA ID	Log2(fold change)	P-adj	Trend
circNARS1(2,3,L4,5,6).1	-8.27209	1.66506e-12	Down
circ(1).105	-6.26759	3.0899e-05	Down
circOPTN(10,13,14).1	-4.20018	1.34347e-05	Down
circEPSTI1(2,3,4,5,6).1	3.66459	2.20151e-07	Up
circVWA8(32,33,37).1	-6.4288	4.24421e-05	Down
circNCOR1(1,2,3).1	3.84956	3.58747e-05	Up
circINPP5F(7,8,9).1	-4.66236	5.7641e-07	Down
circPECR(2,L3,4).1	-3.64337	8.48106e-06	Down
circRICTOR(3,4,5).1	3.96113	2.4055e-06	Up
circSNAP47(1).1	6.18811	3.82121e-05	Up
circHIP1(L4).1	3.6175	3.86434e-05	Up
circADAM17(15,16).1	3.69042	4.85026e-07	Up
circ(4).70	3.29626	4.84364e-06	Up
circCPQ(2L).1	-7.00642	1.04516e-07	Down
circDNAJC14(3,4).1	3.1245	9.32007e-06	Up
circUSP18(2,3).1	3.26927	3.19152e-06	Up
circLRRK2(42,43,46,47).1	-8.55189	7.83792e-14	Down
circEP300(25,26,27).1	7.19142	4.69283e-09	Up
circKPNA6(9,10,11).1	7.49561	2.2834e-10	Up
circCCNI(3S,4,5,6,L7).1	7.47776	2.62395e-10	Up
circCCNI(7L).1	-7.18997	1.74889e-08	Down
circRSF1(10L).2	3.43825	9.05997e-06	Up

## Sheet: 7dpi
circRNA ID	Log2(fold change)	P-adj	Trend
circNARS1(13,L14,15).1	6.16135	0.000112809	Up
circTIAM2(17,18).1	4.38412	1.41325e-06	Up
circTRPM7(26,27,28,29).1	2.2225	8.94148e-05	Up
circGOLM2(7,8).1	5.92043	0.000361708	Up
circBUB1B(9,10,11,12,13,14).1	2.33321	0.000161882	Up
circRASGRP1(12,13L).1	5.94911	0.000288775	Up
circIGF1R(2).1	3.07771	3.5817e-07	Up
circCD226(4).1	3.19491	0.000264862	Up
circMTHFD1L(5,6L,7).1	6.17548	6.01066e-05	Up
circPIAS1(5,6,7).1	2.38346	0.000217799	Up
circTXNDC16(14,15).1	-2.20986	0.000169584	Down
circPSIP1(5,6,7).1	2.74233	1.57921e-06	Up
circERP44(6,7).1	3.55318	3.29251e-05	Up
circPSMD5(4L,5,6).1	6.08977	0.000119889	Up
circC5(34,35,36,37).1	2.97985	0.000375499	Up
circSETX(11,12,13).1	2.24521	0.00022113	Up
circCOQ3(1,2,3).1	6.04177	0.00016016	Up
circLCA5(2,3).1	-6.3555	6.47762e-06	Down
circENSSSCG00000035007(5,S6).1	6.26607	3.14022e-05	Up
circLBR(2,3).1	2.61823	8.33912e-06	Up
circ(10).12	6.46309	7.35167e-06	Up
circUBAP2(7,8).1	2.31279	9.87899e-05	Up
circZEB1(I001).2	2.10421	1.62147e-05	Up
circMRC1(25,26).1	-2.95037	7.77127e-06	Down
circUPF2(3,4,5,6).1	2.29626	0.000163275	Up
circKIN(6,7).1	5.91706	0.000327156	Up
circITIH5(3,4,5).1	-2.27875	2.13661e-05	Down
circSFMBT2(2,3,4).1	2.16991	1.88557e-05	Up
circGPATCH2(3,4,5).1	3.28268	9.0375e-05	Up
circRRP15(2,3,4).1	-2.96691	3.31319e-08	Down
circRAB3GAP2(I037).1	2.30211	0.000145877	Up
circLCP1(8,9).1	3.82458	1.09297e-05	Up
circEPSTI1(3,4,5).1	3.13733	0.000228241	Up
circWASF3(4,5,6).1	5.99281	0.000205684	Up
circDACH1(L2).2	7.60359	1.76591e-10	Up
circEFNB2(3).1	-6.20789	1.77721e-05	Down
circMETRNL(3).1	6.73903	8.27432e-07	Up
circCOPRS(3,4S).1	2.11194	0.00026429	Up
circITGAE(S14).1	3.13407	3.46488e-07	Up
circPHC3(9,10).1	2.00049	0.000110735	Up
circPHC3(8,9,10).1	2.04301	0.000344429	Up
circPARL(L2,3,4,5).1	-2.63929	6.81105e-06	Down
circPHLDB2(L3,4).1	6.80748	4.61583e-07	Up
circCD96(4,5).1	3.09105	6.83747e-08	Up
circTGFBR2(3,4).1	2.08088	0.000107451	Up
circTIAM1(12,13,14).1	3.47274	3.92042e-07	Up
circSCAF4(8,9,10).1	2.3998	3.63935e-05	Up
circMORC3(7,8,9,10).1	2.03581	8.14403e-05	Up
circMX2(12,13).1	2.68318	1.09258e-05	Up
circMX1(4,5).1	5.08756	1.5345e-09	Up
circANO10(I048).1	-6.35584	4.96434e-06	Down
circRBM6(4,5,6).1	-7.32613	4.93428e-07	Down
circGNL3(8,S9,10).1	6.24956	3.86475e-05	Up
circSATB1(3,4,L5).1	7.56524	2.92009e-10	Up
circXRN1(3,4,5).1	4.91333	1.02848e-12	Up
circDHX36(5,6).1	3.03668	5.94391e-05	Up
circKIF11(7,8,11,12).1	3.17199	0.000244453	Up
circSLF2(13,14,15).1	6.03812	0.000155145	Up
circFAM53B(1,2).1	4.10072	1.85521e-05	Up
circC10orf90(6,7).1	6.64582	2.0374e-06	Up
circMED13L(4,5).1	5.98415	0.000252332	Up
circSPPL3(3,4,5,6,7).1	6.31839	2.36524e-05	Up
circGRK3(2,3,4L).1	-3.31965	5.49544e-06	Down
circMTMR3(2,3,4,5).1	2.70566	9.40137e-06	Up
circCCDC6(3,4).1	2.23183	0.000308053	Up
circPTPN4(11,12,13,14,15).1	6.31453	2.76041e-05	Up
circPRPF40A(L6,7,8,9,10,11,12,13).1	1.98115	0.000249599	Up
circLNPK(2,3,4).1	6.04879	0.000143697	Up
circSTAT1(2,3,4).1	2.97087	0.000146304	Up
circDROSHA(17,18,19).1	6.06741	0.000151667	Up
circCENPK(6,7,8).1	2.03341	0.000209962	Up
circRANBP17(17S,18,19,20).1	-1.8925	0.000149683	Down
circRNF145(3,4).1	2.03131	3.48761e-05	Up
circCYFIP2(2,3).1	3.31352	0.000173795	Up
circATP9A(2,3,4).1	3.5911	7.89539e-09	Up
circENSSSCG00000040829(S7).1	-3.34502	3.31113e-09	Down
circDOCK4(9,10,11,12).1	-1.85506	0.000137885	Down
circHERPUD2(3,4,5).1	2.77488	0.000212564	Up
circENSSSCG00000016426(6,7,S8).1	6.17181	9.76936e-05	Up
circGALNTL5(7,8).1	-4.50979	2.61682e-07	Down
circSLC37A3(4,5,6,7,8,9).1	5.97491	0.000229917	Up
circHSPA4(3,4,L5).1	-2.23514	7.20505e-05	Down
circMATR3(6,7,L8).1	2.25277	1.17047e-05	Up
circSVIP(2,3).1	3.99083	4.89333e-05	Up
circPRMT3(8,9,10).1	-2.42917	0.000146849	Down
circCPT1A(7,8).1	2.84757	6.13826e-06	Up
circSOX6(5,6).1	6.72618	8.28528e-07	Up
circIL27RA(5,6,7,8).1	6.19027	7.22582e-05	Up
circVCAN(1,2).1	1.92844	0.000165461	Up
circASRGL1(3,L4).1	-6.43632	3.02445e-06	Down
circEIF2AK2(5,6L).1	3.89121	3.16846e-08	Up
circEIF2AK2(12L).1	3.82502	9.38326e-12	Up
circBIRC6(71,72).1	2.23526	0.000174167	Up
circNUPR1(I003).4	6.15615	7.88451e-05	Up
circGTF3C1(25,26,27).1	-4.19607	3.65205e-07	Down
circSUSD3(2,3L).1	2.96017	8.51369e-08	Up
circFAM120A(3).1	2.68463	3.89392e-05	Up
circAFF3(L4,5,6).1	4.20116	5.12744e-06	Up
circTIA1(3S,L4,L5,6,7).1	2.0736	0.000173924	Up
circEHBP1(12,13,L14,15S).1	6.37816	1.6296e-05	Up
circREL(2,3,4).1	2.10105	0.000367886	Up
circFANCL(L2,3).1	2.39538	1.5804e-06	Up
circVRK2(3,4,5).1	6.42308	1.23108e-05	Up
circPNPT1(11,12,13,14L).1	2.13189	2.93346e-05	Up
circ(4).70	2.26652	3.21101e-05	Up
circ(4).73	-2.80182	9.31671e-05	Down
circCPQ(L6).2	-6.47278	3.62336e-13	Down
circCPQ(2L).1	-2.33942	2.59111e-05	Down
circWWP1(2,3,4).1	2.9829	7.29579e-06	Up
circIGSF9(7,8,9).1	6.41643	1.18269e-05	Up
circASH1L(L7).2	2.18044	0.000335367	Up
circPRPF3(5,6).1	3.23892	0.000108963	Up
circACSS3(10,11,12,13).1	3.22382	2.76965e-06	Up
circPAWR(6S,7,8S).1	2.29144	0.000223156	Up
circFAR2(L2).1	5.90365	0.00033789	Up
circUSP18(2,3,4).1	3.48724	1.17058e-09	Up
circLRRK2(10,11,12,13).1	-1.7215	0.00036943	Down
circLRRK2(20,21).1	-2.80206	1.04945e-05	Down
circBRD1(2).1	6.07742	0.000123152	Up
circC12orf29(3,4,5).1	1.82748	0.000237961	Up
circSMCHD1(10,11,12).1	2.22605	0.000184731	Up
circSMCHD1(6,7,10,11,12).1	3.5869	1.91509e-07	Up
circZC3H18(4,5,6,7,8).1	-1.96656	0.000123058	Down
circHERPUD1(2,3,4).1	5.98447	0.000237614	Up
circANKRD27(5,6,7,8,9).1	2.63712	0.000132685	Up
circGYS1(3,4).1	3.49882	3.94948e-06	Up
circENSSSCG00000002427(31,32,33,34).1	-1.93285	0.000310444	Down
circTC2N(2,3).1	2.79996	7.92208e-06	Up
circPAPOLA(2,3,4,5L).1	3.22196	0.000326448	Up
circVRK1(3,4,5,7,8S).1	-2.99537	2.45891e-06	Down
circENSSSCG00000001075(3,L4).1	2.7032	7.14034e-06	Up
circRIPOR2(16,17,18,19).1	6.1356	8.26641e-05	Up
circENSSSCG00000052432(S1).1	-11.2994	1.43627e-15	Down
circENSSSCG00000052432(S1).4	8.89847	4.40231e-14	Up
circENSSSCG00000041410(S2).1	3.12851	8.01775e-05	Up
circVPS52(5,L6).1	6.053	0.000165996	Up
circDNAH8(23,25,26).1	-3.17116	2.40962e-05	Down
circDNAH8(30,31,32).1	-2.26589	2.13207e-05	Down
circF13A1(5,6).1	8.92718	2.22351e-17	Up
circFAH(2,3,4,5).1	6.44808	7.99084e-06	Up
circIL16(6,S7).1	1.90426	0.00030634	Up
circWHAMM(5,6).1	2.02487	0.00026192	Up
circARHGEF40(L9,11,RI,12,13).1	2.49678	0.000197719	Up
circMANBA(7,8).1	-3.01612	8.85724e-06	Down
circNFKB1(7,8).1	-2.48514	5.09741e-05	Down
circHERC5(14,15,17,18).1	6.71506	9.40036e-07	Up
circHERC6(18,19).1	2.33383	0.000273081	Up
circCCDC149(2,3,4).1	3.08889	3.604e-05	Up
circRELL1(2,3).1	-4.36079	4.98511e-08	Down
circENSSSCG00000053790(I001).4	4.6729	1.31713e-05	Up
circAPBB2(7,8,9,10).1	2.50704	2.96274e-05	Up
circATP8A1(22,23,24).1	3.44443	8.37619e-05	Up
circATP8A1(7L,8,9,RI,10).1	5.99211	0.000263416	Up
circCLOCK(2S,3,4,5,6).1	-4.96369	9.24777e-06	Down
circBTC(5,6).1	-3.92043	1.6775e-10	Down
circNAA15(5,6,7).1	5.96734	0.00030475	Up
circSUCO(2,3,4,6).1	2.95199	0.000117636	Up
circSUCO(7,8,9).1	2.20558	6.50289e-05	Up
circNPL(L3).1	-2.30584	2.17186e-05	Down
circPPP2R5A(2,3,4).1	2.40202	0.000250606	Up
circINTS7(L18).1	2.48198	6.59001e-05	Up
circENSSSCG00000035996(2,L3,4,6,7).1	-3.5137	9.94215e-05	Down
circGRB10(2,3,4).1	3.17127	6.38908e-05	Up
circETS1(I002).2	5.93864	0.000298241	Up
circNUP98(14,15).1	2.01472	0.000368281	Up
circATP2B4(I013).1	4.59396	1.97412e-07	Up
chrAEMK02000452.1:1904845|1906307	6.38177	1.69195e-05	Up
chrAEMK02000452.1:3658935|3699164	7.19754	9.09292e-06	Up
chrAEMK02000602.1:109451|110148	3.78829	0.000189034	Up
chrX:11431694|11455528	-4.6642	0.000138629	Down
chrX:41282982|41285463	2.44347	1.36782e-05	Up

## Sheet: 21dpi
circRNA ID	Log2(fold change)	P-adj	Trend
circNARS1(2,3,L4,5,6).1	2.49509	1.05112e-05	Up
circMYO5A(14,15).1	-6.00369	0.000132585	Down
circDMXL2(9,13).1	-3.58782	8.66664e-05	Down
circDUOX1(10,11,12,13,14).1	-5.83634	0.00035646	Down
circFMN1(2L).2	6.21043	2.80259e-05	Up
circIGF1R(2).1	2.50602	4.39692e-05	Up
circCCDC170(2,3,4,5).1	-4.71962	4.16343e-05	Down
circCCDC170(3).1	-3.39583	9.59615e-05	Down
circKATNA1(2,3).1	-5.86008	0.000326551	Down
circAFDN(2,3,4,5).1	-3.54926	4.08502e-09	Down
circAFDN(2,3,4).1	-3.17391	0.000270003	Down
circSAV1(2).1	-2.26942	0.000231711	Down
circSYNE2(75,76,77).1	-5.8758	0.000286457	Down
circMPDZ(14,15).1	-3.00079	1.30824e-05	Down
circMPDZ(32,L33,34).1	-2.65259	1.37064e-05	Down
circPHACTR2(10,12,S13).1	-6.31222	1.55382e-05	Down
circABCA1(3,4,S5).1	4.23773	6.52139e-12	Up
circABCA1(2,3,4,S5).1	6.61018	7.48749e-07	Up
circWHRN(2,3).1	-6.03321	0.000130018	Down
circENPP1(18,19,20).1	-3.96248	1.54709e-06	Down
circSLC16A10(4).1	-2.56049	1.17818e-06	Down
circLCA5(2,3).1	-3.31078	1.08025e-06	Down
circLCA5(2,4,5,6,7).1	-5.98979	0.00024945	Down
circ(10).11	5.77879	0.000345207	Up
circ(10).12	3.31905	0.000207649	Up
circENSSSCG00000056803(1,L2).1	-2.34276	0.000211469	Down
circZEB1(I001).2	1.77206	0.000296129	Up
circMRC1(25,26).1	-2.34855	4.40268e-05	Down
circACBD5(I001).2	2.72555	2.48809e-05	Up
circACBD5(L4,5,6).1	-4.93995	2.07937e-08	Down
circITIH5(3,4,5).1	-2.96621	1.105e-07	Down
circSFMBT2(3,4).1	3.47492	6.76311e-08	Up
circTASOR2(2L,3,4).1	-6.10319	6.90523e-05	Down
circPOSTN(L6,S8).2	-5.87733	0.000323614	Down
circFNDC3A(6,7,8).1	5.816	0.000299588	Up
circ(11).39	-2.91569	0.000157789	Down
circVWA8(2,3,4).1	-3.41414	3.69897e-05	Down
circVWA8(32,33,34,35).1	-5.90411	0.000258091	Down
circTDRD3(2,3,4).1	2.62574	2.82344e-05	Up
circPSPC1(L2).1	-2.32784	0.000205093	Down
circFLT1(2,3).1	-3.98442	2.14392e-07	Down
circEFNB2(3).1	-3.27046	1.1968e-05	Down
circATP11A(3,4,5,6).1	-3.18273	2.94007e-08	Down
circCCDC47(S2,3,5,6).1	-6.01052	0.000156037	Down
circTANC2(10,11).1	-3.94355	0.000177923	Down
circNBR1(14,L15).1	-5.87624	0.000355751	Down
circEIF4A3(2,3,4,5,6).1	-2.14127	0.000309816	Down
circUTP18(2,3,4,5).1	3.32453	6.25536e-05	Up
circMYO1D(11,12,15,16).1	-6.81722	3.58375e-07	Down
circSPECC1(10,11,12).1	3.35336	0.000117384	Up
circSPECC1(2).1	6.18949	2.99368e-05	Up
circ(12).61	-8.75599	3.55095e-16	Down
circPRPSAP2(1L,2,3).3	-2.54803	5.25902e-06	Down
circPRPSAP2(1L,2).5	-2.12142	0.000137086	Down
circCD96(4,5).1	2.23269	0.00016269	Up
circST3GAL6(3,4,5,6).1	-2.64324	2.84617e-05	Down
circST3GAL6(1,2,3,4,5,6).1	-1.8707	0.000325143	Down
circST3GAL6(1,2,3,4).1	-2.53367	4.92103e-06	Down
circLRRFIP2(16,17,18,19,20).1	-4.69174	0.000124821	Down
circ(13).4	-4.70663	5.52162e-10	Down
circXRN1(3,4,5).1	3.55421	0.000183081	Up
circPLCE1(4).1	-6.35247	9.95074e-06	Down
circPDCD4(2,3).1	3.17427	1.95701e-05	Up
circPDCD4(7,8,9).1	2.94938	4.90092e-05	Up
circINPP5F(13,14).1	-2.94464	1.29435e-05	Down
circSEC23IP(L5).1	-2.91786	2.32274e-05	Down
circHTRA1(3,4L).1	5.94702	0.00014532	Up
circHTRA1(4L,5S).1	3.95367	2.58454e-06	Up
circFDFT1(3,4,5).1	-6.0527	9.68912e-05	Down
circSPPL3(5,6,7).1	2.9335	0.00027852	Up
circATP6V1B2(3,4,5).1	2.12404	0.000180553	Up
circMTR(7,8,9,10,12S,13).1	-3.54791	0.000325863	Down
circRTKN2(2,3,4,5,6,7).1	-6.20447	4.37481e-05	Down
circBMPR1A(4,5).1	-2.95542	0.000137165	Down
circENSSSCG00000016119(1S,2,3).1	6.8686	9.6505e-08	Up
circIKZF2(6,8).1	-6.51442	4.24543e-06	Down
circSLC11A1(L7,9).1	-3.39039	0.000246204	Down
circBAZ2B(26,27).1	-3.15935	7.20645e-06	Down
circGPCPD1(8,9,10).1	-2.87198	2.13543e-06	Down
circGPCPD1(2,3,L4).2	-6.0527	9.68912e-05	Down
circPHF20(5,7,8).1	-6.24271	3.15824e-05	Down
circCTNNBL1(3L).1	-6.14811	6.44521e-05	Down
circIFT52(3,4,5,6).1	7.31719	1.40107e-09	Up
circENSSSCG00000040829(S7).1	-2.8817	5.36233e-07	Down
circDOCK4(9,10,11,12).1	-2.17623	1.54121e-05	Down
circTNS3(15,16,17).1	2.26934	2.27314e-05	Up
circGALNTL5(7,8).1	-2.95308	6.62833e-06	Down
circSUGCT(2,L3,4,5,6).1	-1.75372	0.000368854	Down
circSLC27A6(2,3,4).1	-2.79615	0.00024129	Down
circPHF21A(2S,L3,L4).1	4.81359	6.28271e-05	Up
circPRR5L(2,3).1	-2.71756	0.000102381	Down
circENSSSCG00000013556(21,22S).1	-2.60088	1.08101e-06	Down
circCANX(10,L11).1	6.29631	1.40621e-05	Up
circRUFY1(4,5,6).1	-2.32622	0.000136975	Down
circATL3(S5,6,7).1	1.94049	0.000270851	Up
circMEF2C(6L,7,8).1	2.38944	6.87084e-05	Up
circ(3).32	-4.13169	1.60768e-07	Down
circASAP2(11,12,13,14).1	5.95575	0.000169443	Up
circ(3).153	-7.7168	2.80066e-11	Down
circ(3).156	-7.90885	3.60293e-12	Down
circADCY9(5,6,9,10).1	-6.34491	1.40417e-05	Down
circCAPG(2,7,8).1	-4.07277	8.18297e-05	Down
circANXA4(8,9,10,11,12,13).1	-5.93551	0.000181913	Down
circMAN1A2(6,7,8).1	2.06266	7.45729e-05	Up
circCSDE1(8,9).1	3.56528	2.71381e-07	Up
circENSSSCG00000005959(L6,7).1	3.72407	9.28124e-08	Up
circ(4).70	-8.34546	8.85276e-13	Down
circ(4).71	-7.41429	1.5492e-09	Down
circ(4).73	-5.5567	1.76522e-14	Down
circ(4).74	-6.99499	1.64629e-07	Down
circTLCD4(4,5,6,7).1	1.94096	0.000259881	Up
circDPYS(5,6,7).1	-8.77572	2.23917e-16	Down
circVPS13B(38,39).1	-6.51671	3.63602e-06	Down
circCPQ(L6).2	-3.81514	1.89495e-07	Down
circSULF1(15,16,17,18,19,20).1	-3.8647	7.47857e-10	Down
circSULF1(16,17,18).1	-3.22383	0.000120387	Down
circSULF1(15,16,17,18).1	-3.74903	2.37667e-09	Down
circASPH(S12,13,14,15).1	-2.5071	0.000293471	Down
circPTGES3(2,L3).1	1.92215	0.000210499	Up
circLRP6(3).1	-1.83557	0.000269363	Down
circLRRK2(5,6,13).1	-2.95787	6.05216e-07	Down
circLRRK2(10,11,12,13).1	-2.36578	5.77804e-06	Down
circLRRK2(24,25).1	-2.98674	3.44177e-07	Down
circLRRK2(42,43,46,47).1	-1.92167	0.000346832	Down
circEP300(25,26,27).1	-6.95449	4.97863e-08	Down
circEP300(20,21,22,23,25,27).1	-6.00078	0.000143475	Down
circST13(4,6).1	2.59575	0.000114011	Up
circCOLEC12(I002).1	-3.68458	1.08233e-07	Down
circCOLEC12(S2,3L).1	-7.61795	1.17992e-10	Down
circCOLEC12(3L).1	-6.80988	2.47118e-07	Down
circCABLES1(6,7,8).1	5.86003	0.000240306	Up
circDHCR24(5L).1	-6.70382	4.94016e-07	Down
circECHDC2(2,3L).1	-6.89478	8.15962e-08	Down
circTESK2(3,4).1	-1.95745	0.000166218	Down
circENSSSCG00000041238(I001).1	-3.22671	8.2556e-07	Down
circENSSSCG00000035376(L2,3S).1	-6.54286	2.43362e-06	Down
circPINK1(3,4,5).1	-2.84227	0.000311145	Down
circKPNA6(9,10,11).1	7.89994	2.52535e-12	Up
circRANBP9(5,6,7).1	-3.03988	0.000105854	Down
circADCK1(4,5,6).1	-6.95034	6.67334e-08	Down
circENSSSCG00000002427(31,32,33,34).1	-4.53646	1.25538e-09	Down
circENSSSCG00000002427(31,32,33).1	-6.61289	1.11109e-06	Down
circENSSSCG00000002427(31,32,S33).1	-5.91713	0.000228188	Down
circENSSSCG00000002427(4,5,6,7,8).1	-6.03881	0.000116338	Down
circRPS6KA5(3,4,5,6).1	-2.35281	0.000199769	Down
circENSSSCG00000052432(S1).1	9.78436	2.208e-11	Up
circBTBD9(2,5,S6).1	-3.34494	3.8512e-05	Down
circDNAH8(23,25,26).1	-5.46423	6.44355e-13	Down
circDNAH8(2,5).1	-5.97667	0.000144497	Down
circDNAH8(L28,29).1	-7.09137	1.31954e-20	Down
circDNAH8(68,69,70,71S).1	-7.35383	1.28788e-09	Down
circDNAH8(30,31,32).1	-6.89991	1.5926e-20	Down
circDNAH8(70,71S,76).1	-7.15026	8.91338e-09	Down
circF13A1(5,6).1	6.75883	2.19277e-07	Up
circMTHFS(L2).1	5.83077	0.000318369	Up
circWHAMM(5,6).1	2.60688	0.000101334	Up
circUBE2Q2(L4,5,6,7).1	-6.31703	0.00027816	Down
circMCTP2(12,13,14,15,16).1	-3.96746	0.000112748	Down
circWDFY3(2L).1	1.97901	0.00011753	Up
circARAP2(3).1	-2.52897	1.6594e-05	Down
circRELL1(2,3).1	-2.68359	0.000278211	Down
circATP8A1(30,31,32,33).1	2.75709	3.67655e-05	Up
circGUCY1B1(L2).1	-3.83123	5.4398e-08	Down
circPAK1(9,10,S11).1	-4.57001	2.07402e-10	Down
circXPR1(5,6,7).1	-2.79641	1.83031e-06	Down
circXPR1(8,11).1	-3.25636	0.000197969	Down
circNPL(L3).1	-3.7117	4.86971e-10	Down
circPLA2G4A(2S,L3).1	-4.70787	3.08739e-05	Down
circENSSSCG00000038506(4,5,6,S7).1	-2.44241	0.000102145	Down
circZNF215(3,4,5).1	2.54076	8.07475e-05	Up
circPDGFD(2L,3).1	3.11257	4.47432e-05	Up
circPPP2R1B(8,9,10,11,12,13).1	-9.57581	1.62998e-20	Down
circITGB8(2,3,4,5,6).1	5.26857	1.98028e-07	Up
chrAEMK02000153.1:17894|18530	-6.22176	8.11974e-05	Down
chrAEMK02000452.1:1904845|1906307	7.46439	3.27404e-10	Up
chrAEMK02000452.1:1906774|1907412	2.51623	1.00902e-05	Up
chrAEMK02000452.1:3658935|3699164	-10.5325	1.0194e-12	Down
chrX:36834742|36835577	-6.01828	0.000113656	Down
chrX:78666497|78689628	-2.23594	9.20077e-05	Down
